# Supplementary material
Source: publisher site journal article supplement (https://www.dovepress.com/article/321498)
Supplement: Supplementary file 1 [file get_supplementary_file.php]

Appendix A

**English version of the S19-HCPs Scale**

1. Country:

2. Age:

- 1. 20-30
  2. 31-40
  3. 41-50
  4. 51+

3. Gender: a) Male b) Female c) I do not want to disclose

4. Occupation: a) Physician b) Nurse c) Pharmacist d) Lab technician E) other (specify)

5. Years of experience in Healthcare:

- 1. 1-5
  2. 6-10
  3. 11-20
  4. 21+

6. Have you worked in a COVID-19 designated facility or Quarantine centers?

7. Did you ever receive training in the following subjects? (Check all that apply.)

☐ COVID-19-related stigma and discrimination

☐ Infection control and universal precautions

☐ Patients’ informed consent, privacy, and confidentiality

☐ Stigma and discrimination related to any illness or disorder

☐ none of the above

8. Are you worried about getting infected with COVID-19?

☐ Yes ☐ No ☐ I Don’t Know

9. How worried would you be about getting COVID-19 if you did the following?

(If any of the following is not one of your job responsibilities, please select “Not applicable.”)

1. Touched the clothing of a patient with COVID-19

☐ Not worried ☐ A little worried ☐ Worried ☐ Very worried ☐ Not applicable

1. Dressed the wounds of a patient with COVID-19

☐ Not worried ☐ A little worried ☐ Worried ☐ Very worried ☐ Not applicable

1. Drew blood from a patient with COVID-19

☐ Not worried ☐ A little worried ☐ Worried ☐ Very worried ☐ Not applicable

1. Took the temperature of a patient with COVID-19

☐ Not worried ☐ A little worried ☐ Worried ☐ Very worried ☐ Not applicable

1. Examine (physically) a patient with COVID-19

☐ Not worried ☐ A little worried ☐ Worried ☐ Very worried ☐ Not applicable

10. Do you typically use any of the following measures when providing care or services for a patient with COVID-19?

1. Avoid physical contact

☐ Yes ☐ No ☐ Not applicable

1. Wear a double mask or N95 mask only

☐ Yes ☐ No ☐ Not applicable

1. Wear double gloves

☐ Yes ☐ No ☐ Not applicable

1. Wear gloves during all aspects of the patient’s care

☐ Yes ☐ No ☐ Not applicable

1. Use any special infection-control measures with patients with COVID-19 that you do not use with other patients

☐ Yes ☐ No ☐ Not applicable

11. If you have the choice; Do you prefer to work with other types of patients rather than COVID-19 patients?

☐ Yes ☐ No ☐ Don’t Know

12. In the past 12 months, how often have you observed the following in your health facility?

a) Healthcare workers unwilling to care for a patient with or thought to have COVID-19.

☐ Never ☐ Once or twice ☐ Several times ☐ Most of the time

b) Healthcare workers providing poorer quality of care to a patient with or thought have

COVID-19.

☐ Never ☐ Once or twice ☐ Several times ☐ Most of the time

c) Healthcare workers talking badly about people with or thought to have COVID-19.

☐ Never ☐ Once or twice ☐ Several times ☐ Most of the time

13. In the past 12 months, how often have you experienced the following?

1. Experienced people were talking badly about you because you care for patients with COVID-19.

☐ Never ☐ Once or twice ☐ Several times ☐ Most of the time

1. Been avoided by friends and family because you care for patients with COVID-19.

☐ Never ☐ Once or twice ☐ Several times ☐ Most of the time

1. Been avoided by colleagues because of your work caring for patients with COVID-19.

☐ Never ☐ Once or twice ☐ Several times ☐ Most of the time

14. How hesitant are healthcare workers in this facility to work alongside a co-worker who got recovered from COVID-19?

☐ Not hesitant ☐ A little hesitant ☐ Somewhat hesitant ☐ Very hesitant

15. Do you think you will get into trouble at work if you discriminate against patients with COVID-19.

☐ Yes ☐ No ☐ Don’t Know

16. Please answer the following questions:

1. There are adequate supplies in my health facility that reduce my risk of becoming infected with COVID-19.

☐ Yes ☐ No ☐ I Don’t Know

1. There are standardized procedures/protocols in my health facility that reduce my risk of becoming infected with COVID-19

☐ Yes ☐ No ☐ I Don’t Know

17. My health facility has written guidelines to protect patients with COVID-19 from discrimination.

☐ Yes ☐ No ☐ I Don’t Know

18. Do you strongly agree, agree, disagree, or strongly disagree with the following statements?

1. Most people with COVID-19 do not care if they infect other people.

☐ Strongly Agree ☐ Agree ☐ Disagree ☐ Strongly Disagree

b. People with COVID-19 should feel ashamed of themselves.

☐ Strongly Agree ☐ Agree ☐ Disagree ☐ Strongly Disagree

c. Getting infected with COVID-19 is a person’s own fault.

☐ Strongly Agree ☐ Agree ☐ Disagree ☐ Strongly Disagree

d. People get infected with COVID-19 because they engage in irresponsible behaviors.

☐Strongly Agree ☐ Agree ☐ Disagree ☐ Strongly Disagree

**Arabic version of the S19-HCPs Scale**

1. الدولة:
2. **العمر:**
   1. 20-30
   2. 31-40
   3. 41-50
   4. 51+
3. **الجنس:**أ) ذكر ب) انثى ج) لا اريد التحديد
4. **المهنة:**أ) طبيب ب) ممرض/ة ج) صيدلي د) فني مختبر د) أخرى (يرجى التحديد)
5. **عدد سنوات الخبرة في مجال الرعاية الصحية:**
   1. 1-5
   2. 6-10
   3. 11-20
   4. 21+
6. **هل عملت في منشأة مخصصة لمرضى COVID-19 أو مراكز الحجر الصحي (ردهات العزل)؟ نعم** ☐ **لا** ☐
7. **هل سبق لك أن تلقيت التدريب في المواضيع التالية؟ (قم بإختيار كل ما ينطبق)**
   1. ☐الوصمة الاجتماعية والتمييز المتعلق ب COVID-19
   2. ☐مكافحة العدوى والاحتياطات الشاملة
   3. ☐موافقة المرضى الواعية، والخصوصية، وسرية معلوماتالصحية للمرضى
   4. ☐الوصمة الاجتماعية والتمييز فيما يتعلق بأي مرض أو اضطراب غير COVID-19
8. **هل أنت قلق من الإصابة بمرض COVID-19؟**
   1. ☐نعم ☐لا ☐لا أعرف
9. **كيف تقيم درجة القلق لديك حول الاصابة ب COVID-19 عند القيام بما يلي؟**

(إذا لم يكن أي من التالي من مسؤوليات وظيفتك، يرجى تحديد "لا ينطبق")

- 1. ملامسة ملابس مريض مصاب ب COVID-19

☐غير قلق ☐قلق قليلا ☐قلق جدا ☐لاينطبق

- 1. ب. العناية بجروح (تبديل ضمادات) مريض مصاب ب COVID-19

☐غير قلق ☐قلق قليلا ☐قلق جدا ☐لا ينطبق

- 1. ج. سحب الدم من مريض مصاب ب COVID-19

☐غير قلق ☐قلق قليلا ☐قلق جدا ☐لا ينطبق

- 1. د. قياس درجة حرارة مريض مصاب ب COVID-19

☐غير قلق ☐قلق قليلا ☐قلق جدا ☐لا ينطبق

- 1. و. فحص مريض مصاب ب COVID-19

☐غير قلق ☐قلق قليلا ☐قلق جدا ☐لا ينطبق

1. **هل عادة ما تستخدم أي من التدابير التالية عند تقديم الرعاية أو الخدمات للمريض المصاب ب COVID-19؟**
   1. تجنب الاتصال الجسدي

☐نعم ☐لا ☐لا ينطبق

- 1. ب. ارتداء قناع مزدوج، أو قناع N95 فقط

☐نعم ☐ لا ☐لا ينطبق

- 1. ج. ارتداء قفازات مزدوجة

☐نعم☐ لا ☐لا ينطبق

- 1. د. ارتداء القفازات أثناء جميع مراحل تقديم الرعاية لمريضالCOVID-19

☐نعم ☐لا ☐لا ينطبق

1. **هل تستخدم أي تدابير خاصة لمكافحة العدوى مع المرضى الذين يعانون من COVID-19 التي لا تستخدمها مع المرضى الآخرين؟**
   1. ☐نعم ☐لا ☐لا ينطبق
2. **هل تفضل العمل مع حالات أخرى من المرضى بدلا من المرضى المصابين بCOVID-19 في حال كان لك الخيار؟**
   1. ☐نعم ☐ لا ☐ لاأعرف
3. **في الأشهر الـ 12 الماضية، ما هي مدة ملاحظتك للتالي خلال عملك في المؤسسات الصحية؟**
   1. العاملون في مجال الرعاية الصحية غير مستعدين لرعاية المريض المصاب أو من يُعتقد بأنهم مصابون ب COVID-19.

☐أبدا ☐مرة أو مرتين ☐عدة مرات ☐معظم الوقت

- 1. العاملون في مجال الرعاية الصحية يقدمون نوعيةرعاية أقل للمرضى او المشتبه باصابتهم ب COVID-19.

☐أبدا ☐مرة أو مرتين ☐عدة مرات ☐معظم الوقت

العاملون في مجال الرعاية الصحية يتحدثون بشكل سيء عن الأشخاص الذين يعانون من أو المشتبه باصابتهم ب COVID-19.

- 1. ☐أبدا ☐مرة أو مرتين ☐عدة مرات ☐ معظم الوقت

1. **في الأشهر الـ 12 الماضية، كم مرة واجهتما يلي؟**
   1. الزملاء من ذوي الخبرة يتحدثون بشكل سيئ عنك لأنك تقوم برعايةالمرضى الذين يعانون من COVID-19.

☐أبدا☐ مرة أو مرتين ☐ عدة مرات☐ معظم الوقت

- 1. ب. يتم تجنبك من قبل الأصدقاء والعائلة لأنك تقدم الرعاية للمرضى الذين يعانون من COVID-19.

☐أبدا☐ مرة أو مرتين ☐ عدة مرات ☐ معظم الوقت

- 1. ج. يتم تجنبك من قبل الزملاء في العمل بسبب عملك من خلال تقديم الرعاية للمرضى الذين يعانون من COVID-19.

☐أبدا ☐ مرة أو مرتين ☐ عدة مرات ☐ معظم الوقت

1. **ما مدى تردد العاملين في مجال الرعاية الصحية في هذا المرفق الصحي/المؤسسة الصحية (الذي تعمل به/ا حاليا) بالعمل إلى جانب زميل في العمل تعافى من COVID-19؟**
   1. ☐لا تردد ☐قليل من التردد☐تردد إلى حد ما ☐تردد بشكل كبير
2. **هل تعتقد بأنك سوف تقع في ورطة في العمل إذا كنت تميز ضد المرضى الذين يعانون من COVID-19.**
   1. ☐ نعم ☐ لا ☐ لاأعرف
3. **ما درجة موافقتك مع الاسئلة التالية؟**
   1. هناك إمدادات (من ادوات الحماية الشخصية) كافية في المرفق الصحي الذي تعمل به و التي من شأنها أن تقلل من خطر الإصابة بالعدوى المرتبطةب COVID-19.

☐اتفق بشدة ☐اتفق ☐ لا اتفق☐لا اتفقبشدة

- 1. هناك إجراءات موحدة/ بروتوكولات في المرفق الصحي الذي أعمل به و التي تقلل من خطر الإصابة بالعدوى ب COVID-19

☐اتفق بشدة ☐اتفق ☐ لا اتفق☐ لا اتفق بشدة

1. **يوفرالمرفق الصحي الذي تعمل به مبادئ توجيهية لحماية المرضى الذين يعانون من COVID-19 من التمييز.**
   1. ☐نعم ☐ لا ☐ لا أعرف
2. **ماهي درجة موافقتك مع الأسئلة التالية؟**
   1. معظم المصابين ب COVID-19 لا يهتمون إذا كانوا ينقلون العدوىللآخرين.

☐اتفق بشدة ☐اتفق ☐ لا اتفق☐ لا اتفق بشدة

- 1. يجب أن يشعر الأشخاص المصابون ب COVID-19 بالخجل من أنفسهم.

☐اتفق بشدة ☐اتفق ☐ لا اتفق☐ لا اتفق بشدة

- 1. الإصابة ب COVID-19 هو خطأ الشخص نفسه.

☐اتفق بشدة ☐اتفق ☐ لا اتفق☐ لا اتفق بشدة

- 1. يصاب الناس بالعدوى من COVID-19 لأنهم ينخرطون في سلوكيات غير مسؤولة (مثل عدم ارتداء الكمامة و عدم الاكتراث بقواعد التباعد الجسدي .. الخ).

☐اتفق بشدة ☐اتفق ☐ لا اتفق☐ لا اتفق بشدة
